# Supplementary material
Source: Copernicus journal article supplement (doi:10.5194/bg-23-2909-2026)
Supplement: Supplementary file 1 [file bg-23-2909-2026-supplement.pdf]

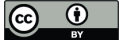

*Supplement of*

## **Imprint of eutrophication on methane-cycling microbes in freshwater sediment**

**Alice Bosco-Santos et al.**

*Correspondence to:* Alice Bosco-Santos ([alice.boscosantos@unil.ch](mailto:alice.boscosantos@unil.ch))

The copyright of individual parts of the supplement might differ from the article licence.

1 Table S1. Data used to construct geochemical profiles of porewater, solid-phase compounds, and dissolved gases  
 2 in Lake Joux sediments for Figure 2 panels A to M.  
 3

| Average depth (cm) | PO <sub>4</sub> <sup>3-</sup> (μM) | NO <sub>3</sub> <sup>-</sup> (μM) | H <sub>2</sub> S (μM) | SO <sub>4</sub> <sup>2-</sup> (μM) | N (%) | P (mg kg <sup>-1</sup> ) | AVS (μg kg <sup>-1</sup> ) | CRS (μg kg <sup>-1</sup> ) | DIC (mM) | δ <sup>13</sup> C <sub>DIC</sub> (‰) | δ <sup>13</sup> C <sub>org</sub> (‰) | TOC (%) | TIC (%) | C/N   | CH <sub>4</sub> (μM) | δ <sup>13</sup> C <sub>CH<sub>4</sub></sub> (‰) | ε <sub>Org-CH<sub>4</sub></sub> (‰) |
|--------------------|------------------------------------|-----------------------------------|-----------------------|------------------------------------|-------|--------------------------|----------------------------|----------------------------|----------|--------------------------------------|--------------------------------------|---------|---------|-------|----------------------|-------------------------------------------------|-------------------------------------|
| 0.50               | 0.62                               | 27.07                             | 4.08                  | 4.42                               | 0.75  | 1229.34                  | 139.62                     | 334.71                     | 2.78     | -12.18                               | -18.31                               | 16.52   | 12.42   | 22.00 | 253.03               | -82.06                                          | 69.4                                |
| 4.50               | 0.89                               | 27.88                             | 8.16                  | 2.33                               | 0.65  | 1445.48                  | 329.03                     | 510.58                     | 3.27     | -10.75                               | -16.72                               | 15.70   | 12.94   | 24.31 | 345.03               | -81.97                                          | 71.1                                |
| 7.50               | 0.73                               | 17.93                             | 12.24                 | 0.47                               | 0.74  | 1295.17                  | 400.37                     | 364.92                     | 3.40     | -8.02                                | -14.76                               | 15.59   | 25.92   | 20.95 | 812.62               | -84.25                                          | 75.9                                |
| 10.50              | 0.74                               | 4.96                              | 4.08                  | 0.74                               | 0.35  | 999.67                   | 418.40                     | 429.68                     | 3.60     | -5.25                                | -10.76                               | 7.30    | 32.87   | 21.05 | 798.00               | -83.97                                          | 79.9                                |
| 13.50              | 0.35                               | 2.28                              | 2.04                  | 0.65                               | 0.39  | 859.18                   | 338.78                     | 322.41                     | 3.70     | -4.05                                | -11.92                               | 10.50   | 36.90   | 26.92 | 807.31               | -83.70                                          | 78.3                                |
| 16.50              | 0.20                               | 0.00                              | 2.04                  | 0.60                               | 0.32  | 1027.04                  | 213.39                     | 353.98                     | 4.02     | -3.07                                | -13.57                               | 6.87    | 39.53   | 21.68 | 927.00               | -82.79                                          | 75.5                                |
| 19.50              | 0.00                               | 0.00                              | 4.08                  | 0.35                               | 0.21  | 2612.27                  | 0.00                       | 157.99                     | 4.23     | -0.50                                | -14.11                               | 8.14    | 34.28   | 38.75 | 1129.39              | -83.62                                          | 75.9                                |
| 22.50              | 0.13                               | 0.00                              | 4.08                  | 0.58                               | 0.23  | 1899.51                  | 0.00                       | 81.66                      | 3.97     | 0.10                                 | -18.10                               | 8.22    | 33.10   | 35.75 | 1111.00              | -83.59                                          | 71.5                                |
| 25.50              | 0.00                               | 0.00                              | 6.12                  | 0.56                               | 0.28  | 1936.08                  | 0.00                       | 42.00                      | 3.71     | -1.33                                | -19.95                               | 9.86    | 19.90   | 35.65 | 1410.16              | -83.99                                          | 69.9                                |
| 28.50              | 0.15                               | 0.00                              | 2.04                  | 0.44                               | 0.32  | 1431.63                  | 0.00                       | 124.83                     | 4.98     | 0.44                                 | -18.22                               | 11.01   | 16.76   | 34.04 | 1487.00              | -84.33                                          | 72.2                                |
| 31.50              | 0.15                               | 0.00                              | 8.16                  | 0.45                               | 0.38  | 1603.06                  | 0.00                       | 82.76                      | 5.91     | -10.77                               | -20.14                               | 15.52   | 11.76   | 40.49 | 1654.57              | -83.90                                          | 69.6                                |
| 34.50              | 0.15                               | 0.00                              | 4.08                  | 3.96                               | 0.97  | 1315.55                  | 111.59                     | 100.98                     | 2.83     | -6.05                                | -16.68                               | 13.96   | 19.12   | 14.45 | 1723.00              | -83.86                                          | 73.3                                |
| 37.50              | 0.12                               | 0.00                              | 4.08                  | 1.01                               | 0.90  | 1961.04                  | 141.59                     | 52.72                      | 3.52     | -4.95                                | -24.23                               | 13.30   | 23.61   | 14.77 | 1730.21              | -83.26                                          | 64.4                                |
| 40.50              | 0.12                               | 0.00                              | 14.28                 | 0.52                               | 0.67  | 2283.19                  | 205.33                     | 102.94                     | 3.68     | -3.10                                | -26.50                               | 13.47   | 25.43   | 20.20 | 1756.00              | -83.46                                          | 62.1                                |
| 43.50              | 0.14                               | 1.00                              | 6.12                  | 0.51                               | 0.63  | 2193.88                  | 214.76                     | 178.76                     | 4.33     | -3.62                                | -28.22                               | 11.32   | 25.71   | 17.94 | 1760.32              | -83.23                                          | 60.0                                |

4  
 5  
 6 Table S2. Data used to construct geochemical profiles of porewater, solid-phase compounds, and dissolved gases  
 7 in Lake Joux sediments for Figure 2 panel N.  
 8

| 1          |                   | 2          |                   | 3          |                   | 4          |                   | 5          |                   | 6          |                   | 7          |                   |
|------------|-------------------|------------|-------------------|------------|-------------------|------------|-------------------|------------|-------------------|------------|-------------------|------------|-------------------|
| Depth (cm) | O <sub>2</sub> μM |
| -0.28      | 223.83            | -0.30      | 211.59            | -0.28      | 310.15            | -0.30      | 256.90            | -0.30      | 285.12            | -0.30      | 248.88            | -0.30      | 294.01            |
| -0.26      | 240.42            | -0.25      | 226.74            | -0.23      | 310.05            | -0.25      | 287.28            | -0.28      | 278.81            | -0.28      | 247.20            | -0.28      | 297.23            |
| -0.24      | 243.66            | -0.20      | 242.15            | -0.18      | 308.52            | -0.20      | 273.05            | -0.25      | 252.27            | -0.25      | 244.91            | -0.25      | 297.00            |
| -0.22      | 242.58            | -0.15      | 245.68            | -0.13      | 297.39            | -0.15      | 221.05            | -0.23      | 235.40            | -0.23      | 243.75            | -0.23      | 295.86            |
| -0.20      | 240.82            | -0.13      | 235.24            | -0.10      | 281.51            | -0.10      | 222.66            | -0.20      | 234.35            | -0.20      | 244.58            | -0.20      | 294.78            |
| -0.18      | 239.05            | -0.10      | 221.43            | -0.08      | 259.85            | -0.05      | 201.02            | -0.18      | 240.73            | -0.18      | 247.60            | -0.18      | 293.95            |
| -0.15      | 238.31            | -0.08      | 202.40            | -0.05      | 233.39            | -0.03      | 188.97            | -0.15      | 245.70            | -0.15      | 252.06            | -0.15      | 293.13            |
| -0.13      | 236.77            | -0.05      | 179.19            | -0.03      | 201.16            | 0.00       | 157.27            | -0.13      | 252.98            | -0.13      | 256.43            | -0.13      | 292.90            |
| -0.10      | 232.23            | -0.03      | 153.76            | 0.00       | 163.34            | 0.03       | 136.82            | -0.10      | 259.70            | -0.10      | 256.84            | -0.10      | 289.65            |
| -0.08      | 223.94            | 0.00       | 129.38            | 0.03       | 121.32            | 0.05       | 112.96            | -0.08      | 259.99            | -0.08      | 251.03            | -0.08      | 282.55            |
| -0.05      | 209.83            | 0.03       | 114.24            | 0.05       | 79.29             | 0.08       | 100.25            | -0.05      | 250.86            | -0.05      | 235.30            | -0.05      | 269.44            |
| -0.03      | 189.74            | 0.05       | 100.63            | 0.08       | 52.49             | 0.10       | 88.69             | -0.03      | 231.46            | -0.03      | 211.40            | -0.03      | 249.35            |
| 0.00       | 161.92            | 0.07       | 83.63             | 0.10       | 26.09             | 0.13       | 78.01             | 0.00       | 202.24            | 0.00       | 181.65            | 0.00       | 228.56            |
| 0.03       | 129.79            | 0.09       | 73.76             | 0.13       | 3.99              | 0.15       | 60.45             | 0.03       | 169.17            | 0.03       | 158.79            | 0.03       | 210.74            |
| 0.05       | 95.46             | 0.11       | 48.12             | 0.15       | -0.03             | 0.18       | 49.24             | 0.05       | 134.00            | 0.05       | 135.37            | 0.05       | 187.24            |
| 0.08       | 62.33             | 0.13       | 31.51             | 0.17       | 0.12              | 0.20       | 45.01             | 0.08       | 114.83            | 0.08       | 115.17            | 0.08       | 170.12            |
| 0.10       | 37.66             | 0.15       | 24.17             | 0.19       | -0.05             | 0.23       | 42.31             | 0.10       | 94.06             | 0.10       | 98.44             | 0.10       | 152.97            |
| 0.12       | 22.58             | 0.17       | 17.34             | 0.21       | 0.50              | 0.25       | 38.14             | 0.13       | 72.98             | 0.13       | 81.39             | 0.13       | 131.26            |
| 0.14       | 8.97              | 0.19       | 10.86             | 0.23       | 0.28              | 0.27       | 29.28             | 0.15       | 48.95             | 0.15       | 60.69             | 0.15       | 116.88            |
| 0.16       | 0.47              | 0.21       | 6.09              | 0.25       | -0.23             | 0.29       | 24.22             | 0.18       | 26.27             | 0.18       | 42.65             | 0.18       | 105.11            |
| 0.18       | 0.00              | 0.23       | 1.89              | 0.27       | -0.01             | 0.31       | 21.36             | 0.20       | 11.10             | 0.20       | 26.99             | 0.20       | 81.23             |
| 0.20       | 0.00              | 0.25       | 0.13              | 0.29       | -0.44             | 0.33       | 17.23             | 0.23       | 0.78              | 0.23       | 13.85             | 0.23       | 65.09             |

|      |      |      |      |      |       |      |      |      |      |      |      |      |       |
|------|------|------|------|------|-------|------|------|------|------|------|------|------|-------|
| 0.22 | 0.00 | 0.27 | 0.00 | 0.31 | -0.20 | 0.35 | 8.09 | 0.25 | 0.00 | 0.25 | 3.57 | 0.25 | 49.59 |
| 0.24 | 0.00 | 0.29 | 0.00 | 0.34 | 0.25  | 0.37 | 3.19 | 0.28 | 0.00 | 0.28 | 0.00 | 0.28 | 35.67 |
| 0.26 | 0.00 | 0.31 | 0.00 | 0.36 | 0.36  | 0.39 | 0.74 | 0.30 | 0.00 | 0.30 | 0.00 | 0.30 | 20.25 |
| 0.28 | 0.00 | 0.33 | 0.00 | 0.39 | -0.23 | 0.41 | 0.24 | 0.33 | 0.00 | 0.33 | 0.00 | 0.33 | 10.45 |
| 0.30 | 0.00 | 0.35 | 0.00 | 0.03 |       | 0.43 | 0.40 | 0.35 | 0.00 | 0.35 | 0.00 | 0.35 | 4.66  |
| 0.35 | 0.00 | 0.40 | 0.00 | 0.03 |       | 0.45 | 0.15 | 0.38 | 0.00 | 0.38 | 0.00 | 0.38 | 0.00  |
|      |      | 0.45 | 0.00 | 0.03 |       | 0.47 | 0.00 | 0.40 | 0.00 | 0.40 | 0.00 | 0.40 | 0.00  |
|      |      | 0.50 | 0.00 | 0.03 |       | 0.50 | 0.06 | 0.43 | 0.00 | 0.43 | 0.00 | 0.43 | 0.00  |
|      |      |      |      |      |       |      |      | 0.45 | 0.00 | 0.45 | 0.00 | 0.45 | 0.00  |
|      |      |      |      |      |       |      |      | 0.48 | 0.00 | 0.48 | 0.00 | 0.48 | 0.00  |
|      |      |      |      |      |       |      |      | 0.50 | 0.00 | 0.50 | 0.00 | 0.50 | 0.00  |
|      |      |      |      |      |       |      |      |      |      | 0.53 | 0.00 | 0.53 | 0.00  |
|      |      |      |      |      |       |      |      |      |      | 0.55 | 0.00 | 0.55 | 0.00  |
|      |      |      |      |      |       |      |      |      |      |      |      | 0.58 | 0.00  |
|      |      |      |      |      |       |      |      |      |      |      |      | 0.60 | 0.00  |
|      |      |      |      |      |       |      |      |      |      |      |      |      |       |

9

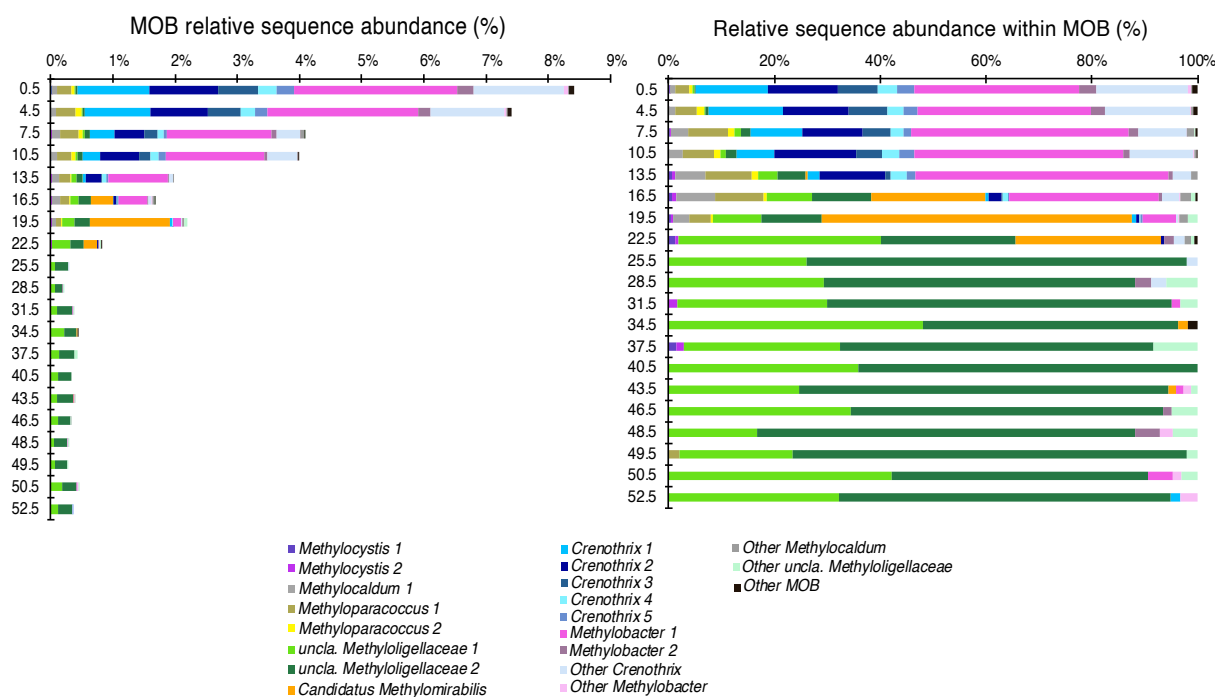

10  
11  
12  
13  
14  
15  
16  
17  
18  
19  
20  
21  
22  
23  
24

**Figure S1.** Depth profiles of methane-oxidizing bacteria (MOB). (A) MOB relative sequence abundance in the total microbial community. (B) MOB composition expressed as relative sequence abundance within the MOB fraction (16S rRNA gene amplicons). Shades of the same color denote the same genera; distinct colors indicate different genera.

25

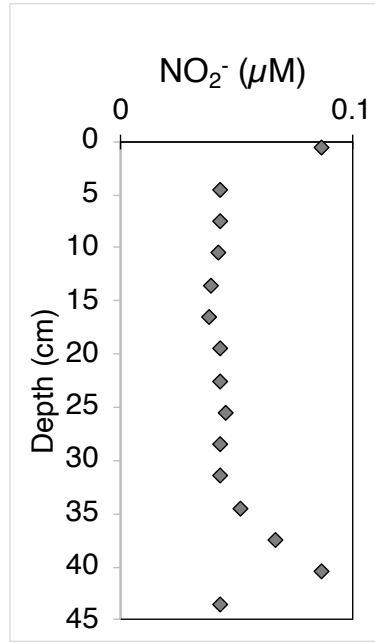

26  
27

Figure S2. Porewater nitrite (NO<sub>2</sub><sup>-</sup>) concentrations versus depth in Lake Joux sediments.

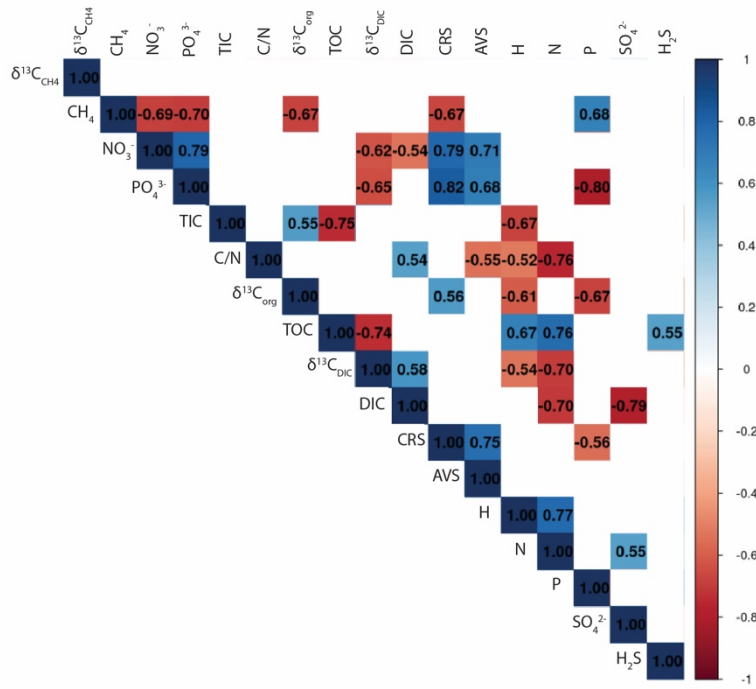

28  
29  
30

Figure S3 - Co-correlation matrix of Spearman pairwise correlation coefficients calculated on a z-scored matrix of environmental variables.

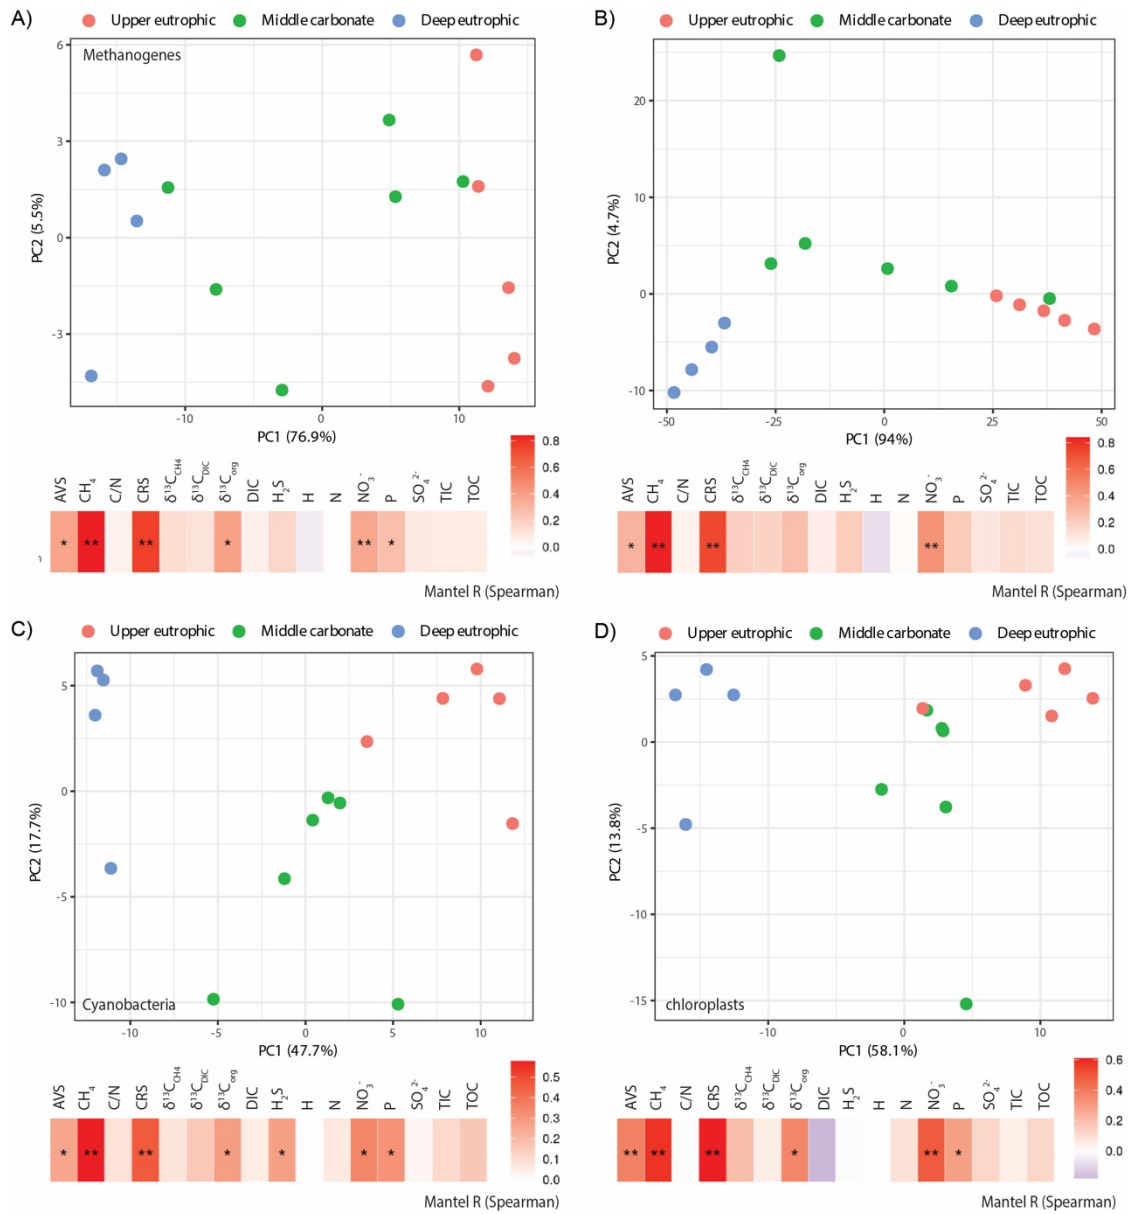

31  
32  
33  
34  
35  
36  
37  
38

**Figure S4** - Principal component ordination of centered log ratio (CLR) transformed 16S rRNA gene amplicon data for specific microbial subpopulations, based on an Aitchson distances for which oversaturated distances were corrected and smoothed using LMDist and mantel tests results (Spearman's rank correlation) of subcommunity dissimilarity (corrected and smoothed Aitchinson distance) and environmental parameters (z-scored). P-values were adjusted for multiple testing using the false discovery rate (FDR) method. \*\*  $p <= 0.01$ ; \*  $p <= 0.05$ . (A) Methanogenes. (B) MOB. (C) Cyanobacteria. (D) chloroplasts.
